# Supplementary material
Source: Springer Nature journal article supplement (https://www.springermedizin.de/resource/supplementary/13012_2009_199_MOESM1_ESM.pdf/9629452)

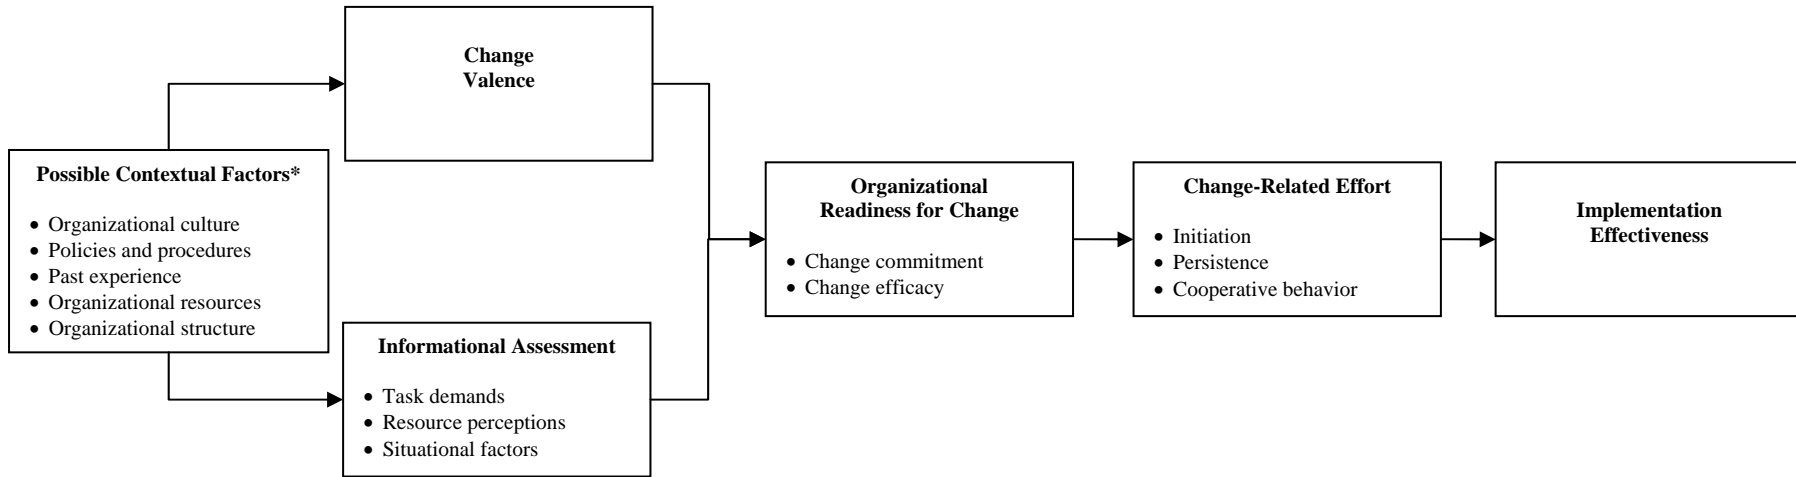

\* Briefly mentioned in text, but not focus of the theory

Supplement: MOESM1 [file 9629452]
